# Supplementary material
Source: publisher figshare collection journal article supplement (https://acs.figshare.com/ndownloader/files/3724294)
Supplement: Supplementary file 1 [file 3724294]

## Supporting Information

### Drug distribution to retinal pigment epithelium: studies on melanin binding, cellular kinetics, and single photon emission computed tomography/computed tomography imaging

Anna-Kaisa Rimpelä<sup>a</sup>, Mechthild Schmitt<sup>a</sup>, Satu Latonen<sup>a</sup>, Marja Hagström<sup>a</sup>, Maxim Antopolsky<sup>a</sup>, José A. Manzanares<sup>c</sup>, Heidi Kidron<sup>a</sup>, Arto Urtti<sup>a,b</sup>

<sup>a</sup> Centre for Drug Research, Division of Pharmaceutical Biosciences, Faculty of Pharmacy, University of Helsinki, P.O. Box 56, FI-00014 University of Helsinki, Finland

<sup>b</sup> School of Pharmacy, University of Eastern Finland, P.O. Box 1627, FI-70211 Kuopio, Finland

<sup>c</sup> Department of Thermodynamics, Faculty of Physics, University of Valencia, E-46100 Burjassot, Spain

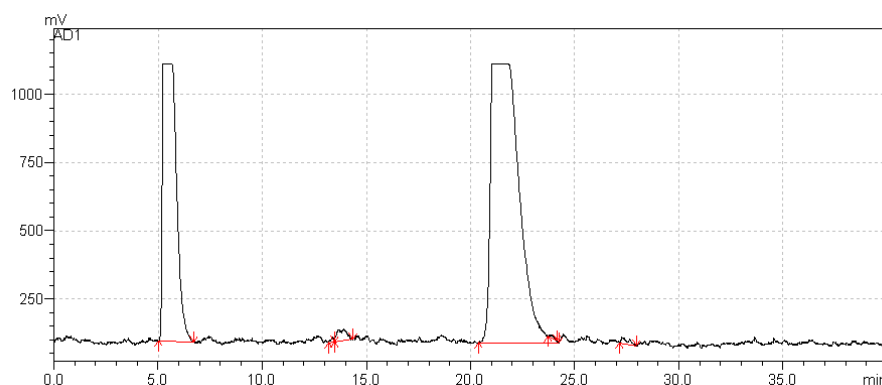

**Figure S1.** HPLC traces of a typical chloroquine radiolabeling reaction. A - 0.05 M  $\text{NaH}_2\text{PO}_4$  buffer, B – 0.05 M  $\text{NaH}_2\text{PO}_4$  buffer in 70 % MeCN, pH = 5.0. Linear gradient from 0 to 70 % B in 30 min. Peak at 22 min corresponds to the target compound; peak at 6 min corresponds to unreacted  $^{123}\text{I}$ .

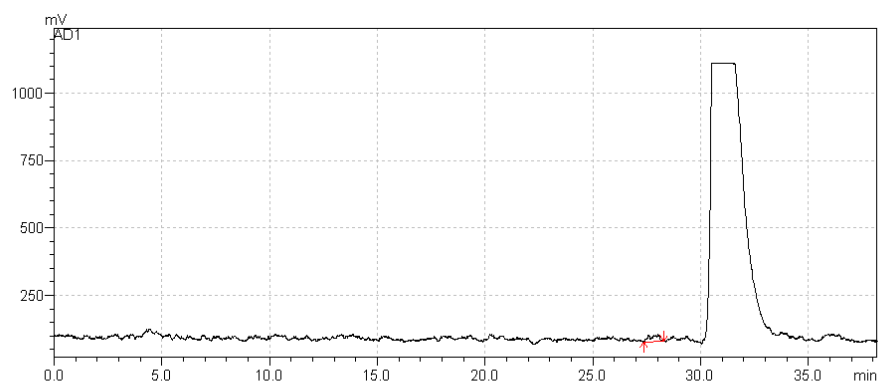

**Figure S2.** HPLC traces of radiolabeled chloroquine after cartridge purification. A - 0.05 M  $\text{NaH}_2\text{PO}_4$  buffer, B – 0.05 M  $\text{NaH}_2\text{PO}_4$  buffer in 70% MeCN, pH = 5.0. Linear gradient from 0 to 50 % B in 30 min. Peak at 32 min corresponds to the target compound.
